# Supplementary material for: Divergent Evolution of TRC Genes in Mammalian Niche Adaptation
Source: PubMed Central journal article supplement (PMC6491686; doi:10.3389/fimmu.2019.00871), 2019-04-24
Supplement: Image_3.pdf [file Image_3.pdf]

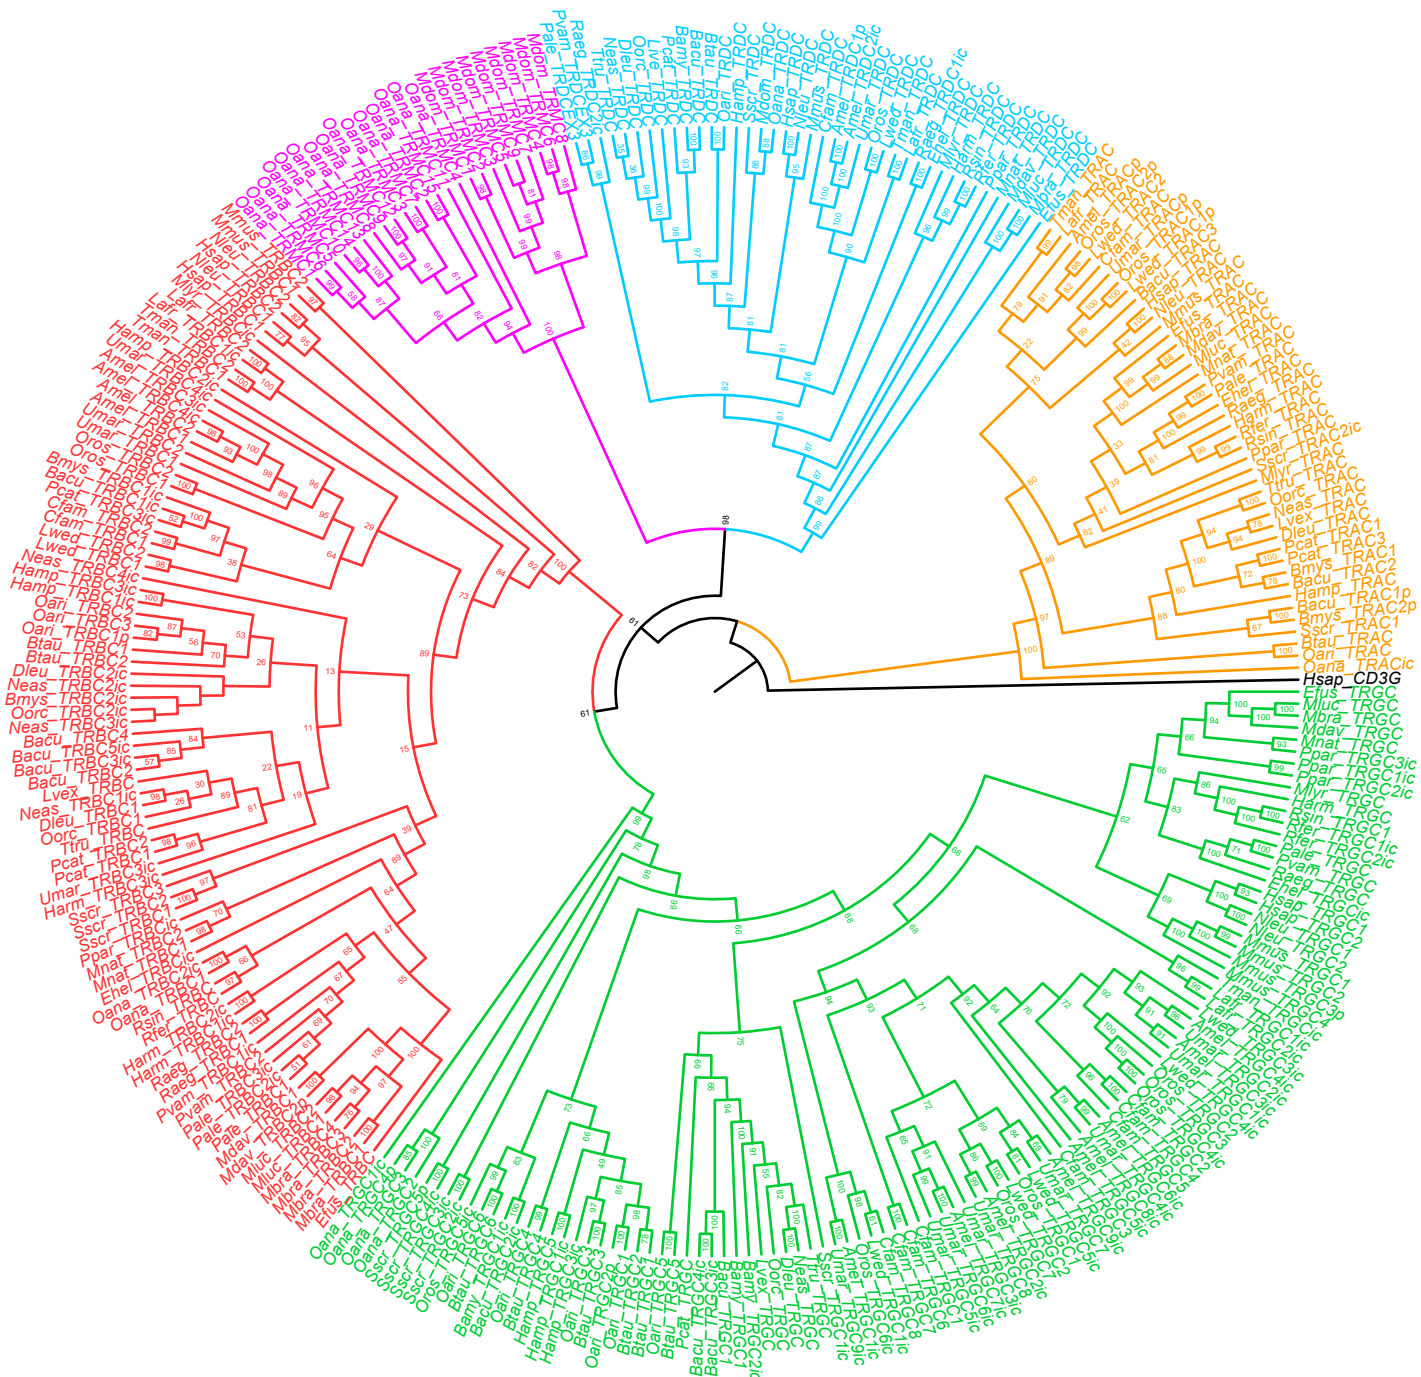

Figure S3 Phylogenetic tree of mammalian TRCs reconstructed by IQ-TREE. Each cluster with different colors indicates corresponding types of TRC genes. Yellow: *TRAC*. Red: *TRBC*. Blue: *TRDC*. Green: *TRGC*. Purple: *TRMC*. Outgroup: *Hsap\_CD3G* (NCBI accession number: XM\_006718941.3)
